# Supplementary material for: Ischemia-induced Neuronal Cell Death Is Mediated by Chemokine Receptor CX3CR1
Source: PubMed Central journal article supplement (PMC5765008; doi:10.1038/s41598-017-18774-0), 2018-01-11
Supplement: 41598_2017_18774_MOESM1_ESM.pdf [file 41598_2017_18774_MOESM1_ESM.pdf]

# **Ischemia-induced Neuronal Cell Death Is Mediated by Chemokine Receptor CX3CR1**

**Running title:** CX3CR1 deficiency prevents ischemic neuronal death

Jinkun Wang<sup>1,\*</sup>, Yan Gan<sup>1,2,\*</sup>, Pengcheng Han<sup>2</sup>, Junxiang Yin<sup>2</sup>, Qingwei Liu<sup>3</sup>, Soha Ghanian<sup>2,4</sup>,  
Feng Gao<sup>1</sup>, Guanghui Gong<sup>1</sup> & Zhiwei Tang<sup>1,2</sup>

<sup>1</sup>Department of Neurosurgery, The First Affiliated Hospital of Kunming Medical University, Kunming, Yunnan, China

<sup>2</sup>Department of Neurology, Barrow Neurological Institute, St. Joseph's Hospital and Medical Center, Phoenix, AZ, USA

<sup>3</sup>Department of Radiology, Barrow Neurological Institute, St. Joseph's Hospital and Medical Center, Phoenix, AZ, USA

<sup>4</sup>Brown University Warren Alpert Medical School, Providence, RI, USA

\*These authors contributed equally to this work.

Correspondence and requests for materials should be addressed to Z.T. (email: tangzhiwei7755@hotmail.com)

## Supplementary Figures

### Figure S1

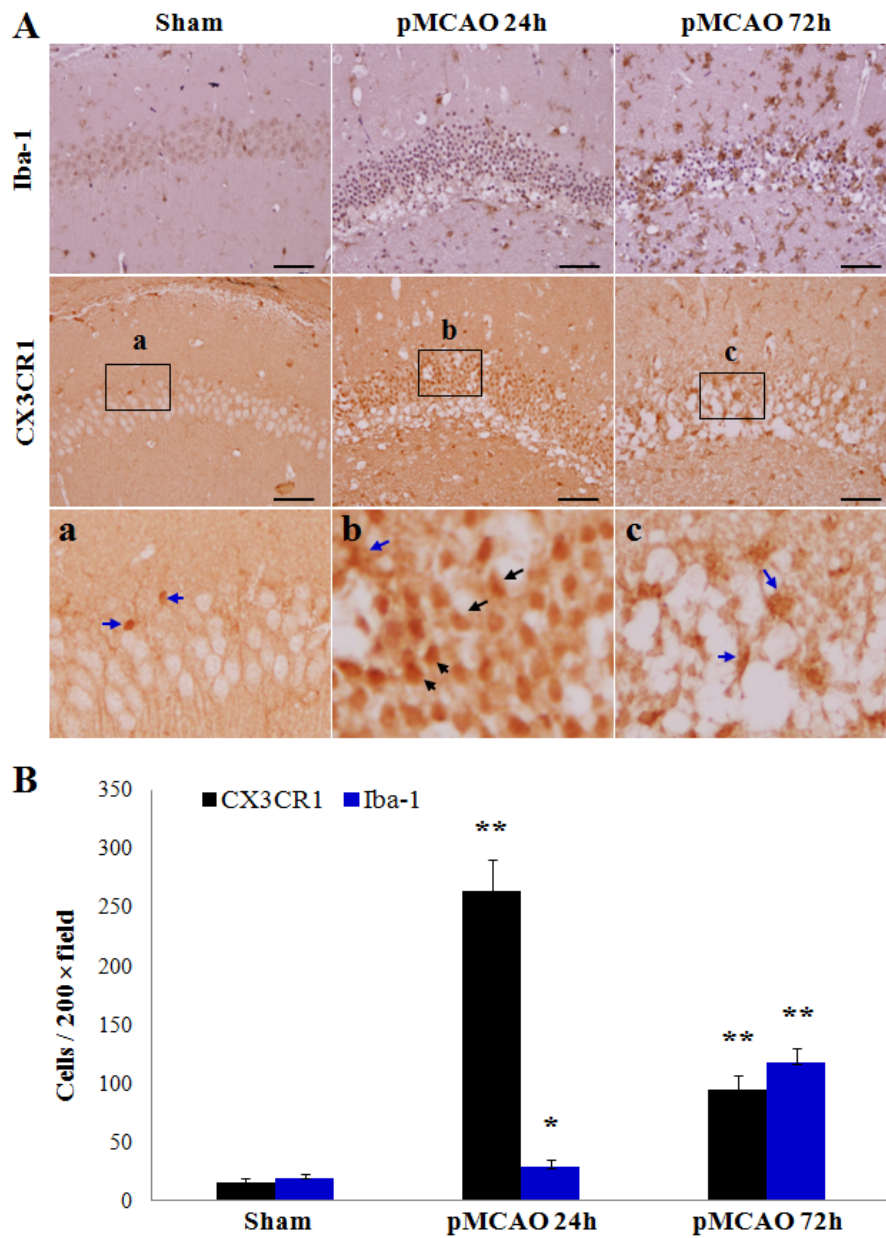

**Fig. S1. Expression of CX3CR1 on microglia in the infarct brain of pMCAO mice.** (A) Iba-1 and CX3CR1 levels were determined in the hippocampus of the ipsilateral hemisphere of C57BL/6 mice 24 and 72 hours after pMCAO by histochemistry staining (upper and middle panel). Sham-operated animals served as controls. Images at the bottom show magnified views

of the boxed areas in the middle panel. The black and blue arrows indicate neuron-like cells and microglia-like cells, respectively. The CX3CR1 positive cells at 72 hours after occlusion are mainly microglia-like cells. Scale bars = 50  $\mu$ m, n = 4/group. **(B)** Semi-quantification analysis showed that the number of CX3CR1 positive cells significantly increased 24 hours and decreased 72 hours after pMCAO (\*\*p < 0.01). Iba-1 positive cells were seen to slightly increase at 24 hours (\*p < 0.05) and peaked at 72 hours (\*\*p < 0.01) post-pMCAO. 72 hours after occlusion the number of CX3CR1 positive cells was close to that of Iba-1 positive cells, demonstrating confirmatory evidence to the morphology findings. Cells were counted in 5 randomly chosen 200 $\times$  magnification fields on five sections in four replicate mice per group in three separate experiments.

**Figure S2**

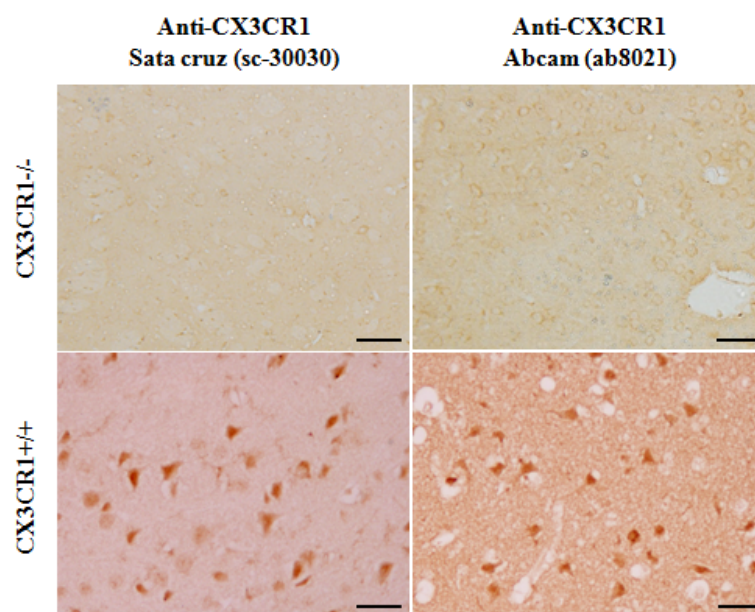

**Fig. S2.** Specificity of the CX3CR1 antibodies was verified by histochemistry staining of brain tissues from the CX3CR1 deficient mice. Anti-CX3CR1 (sc-30030) and anti-CX3CR1 (ab8021) were used for immunostaining and western blot in the current study. Both did not show immunoreactivity to brains tissues of CX3CR1<sup>-/-</sup> mice (upper panel), but positively reacted with CX3CR1<sup>+/+</sup> tissues from wild type mice (bottom panel). Scale bars = 50  $\mu$ m, n = 4/group.
